# Supplementary material for: Habitual Choline Intakes across the Childbearing Years: A Review
Source: MDPI journal article supplement (doi:10.3390/nu13124390), 2021-12-08

**Supplemental Table S1.** Search key terminologies.

---

**Population – Women of Childbearing Age**

---

“childbearing” [tiab] OR “pregnan\*” [tiab] OR “periconcept\*” [tiab]  
OR “lactat\*” [tiab] OR maternal [tiab] OR “mother\*” [tiab] OR “women”  
[tiab] OR “females” [tiab] OR “adults” [tiab] OR “pregnant  
women”[Mesh] OR “Breast Feeding”[Mesh] OR “lactation” [Mesh]

---

**Habitual Choline Intakes from habitual food and supplementation sources**

---

“choline nutri\*” [tiab] OR “choline intake” [tiab] OR “choline diet\*”  
[tiab] OR “choline food\*” [tiab]

---

**Excluded Publications**

Mouse [tiab] OR mice [tiab] OR rat [tiab] OR rats [tiab] OR murine  
[tiab] OR bovine [tiab]

---

**Final Search #1 AND #2 NOT #3**

---

**Supplementary Figure S1: Non-pregnant women.**

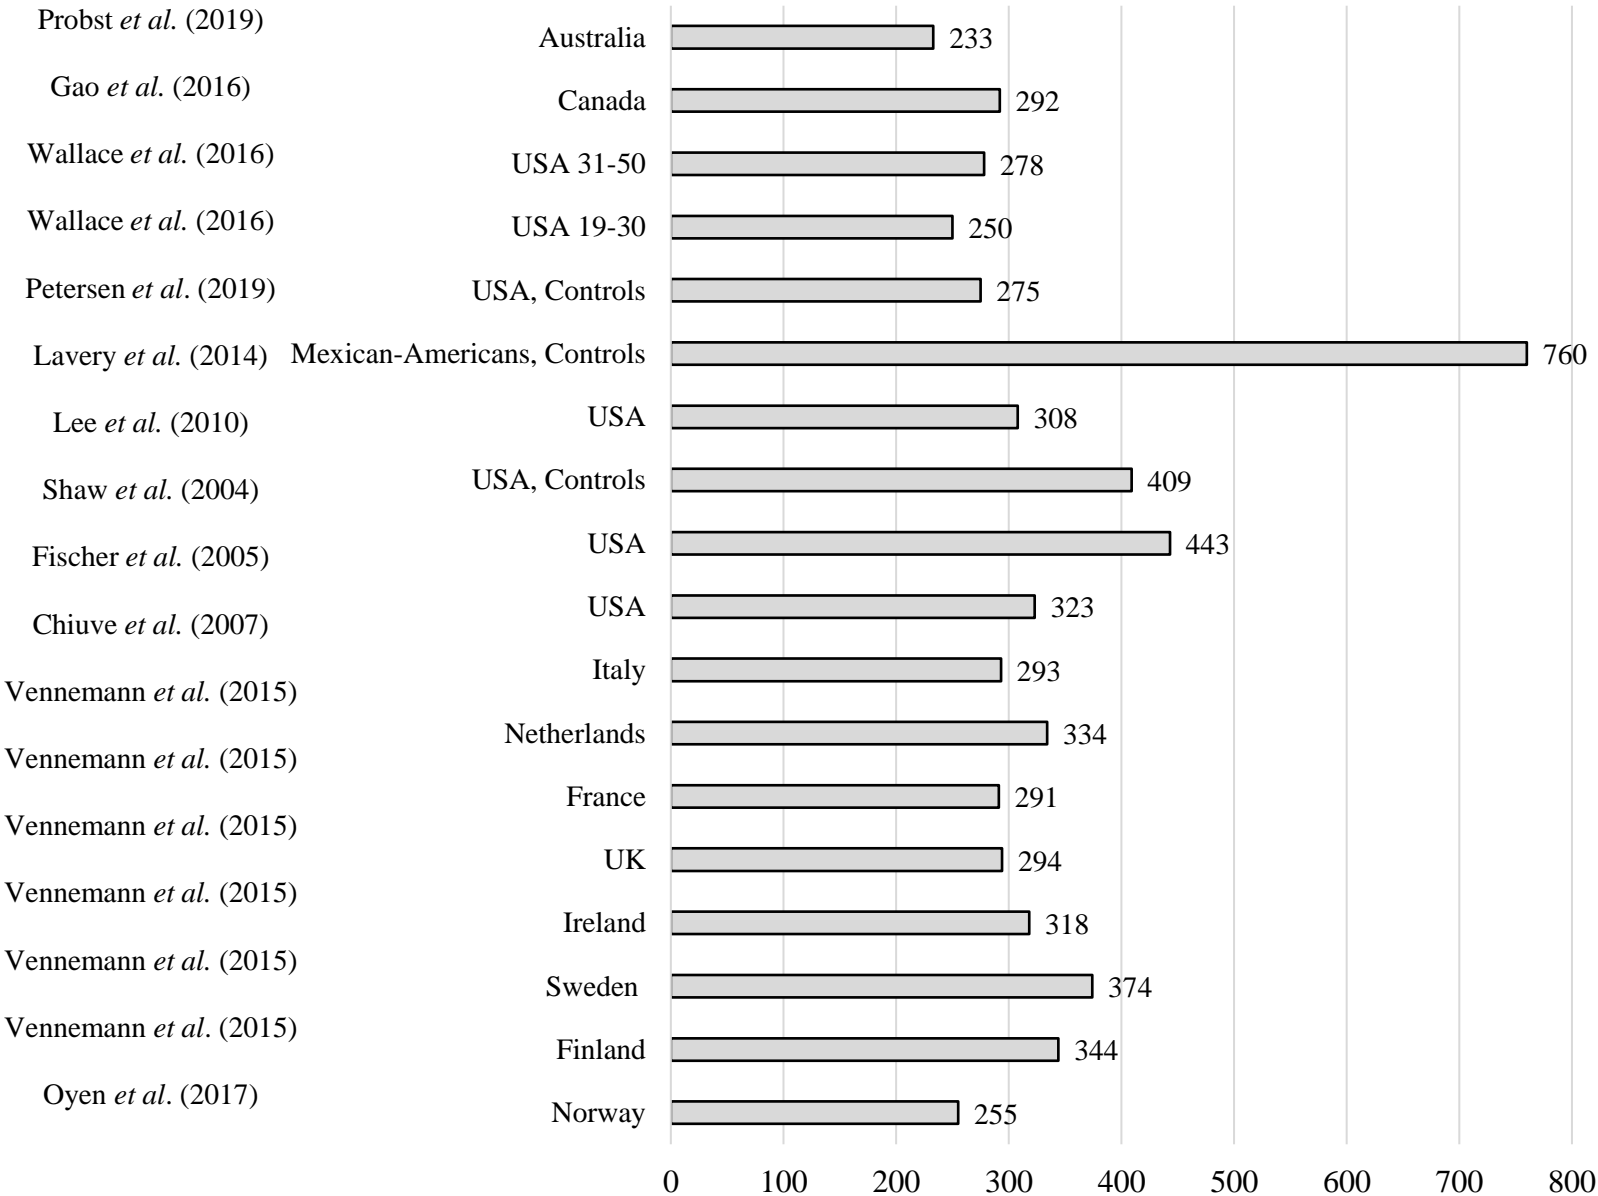

## Supplementary Figure S2; Pregnancy.

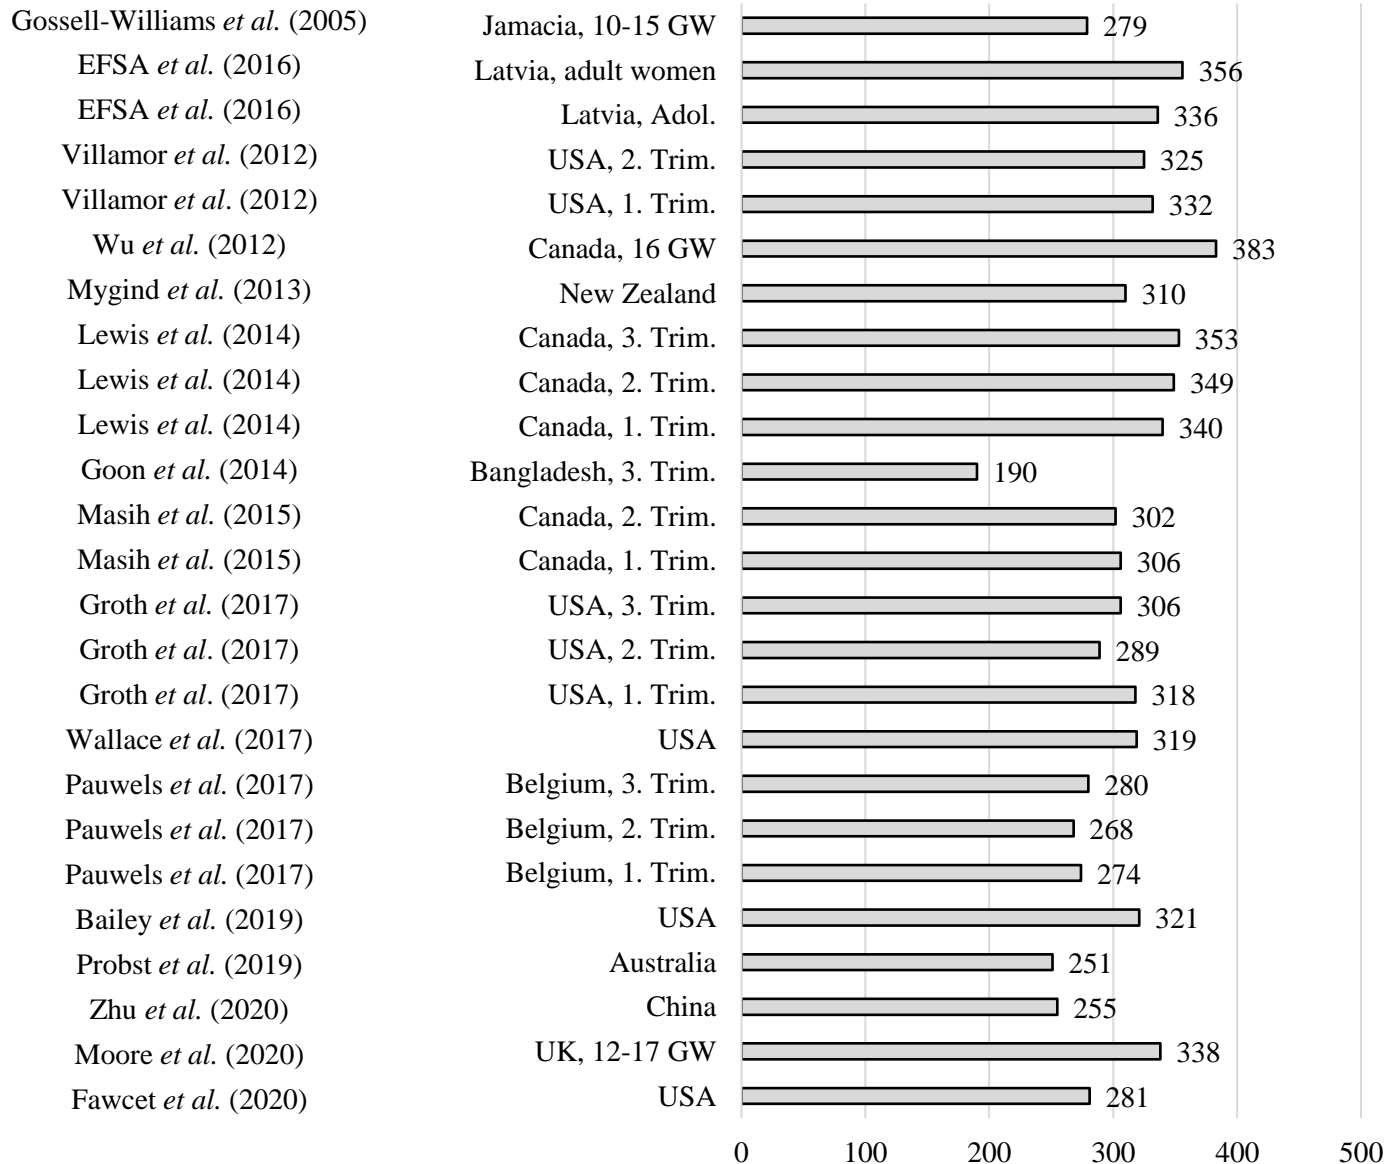

Supplementary Figure S3; Lactation

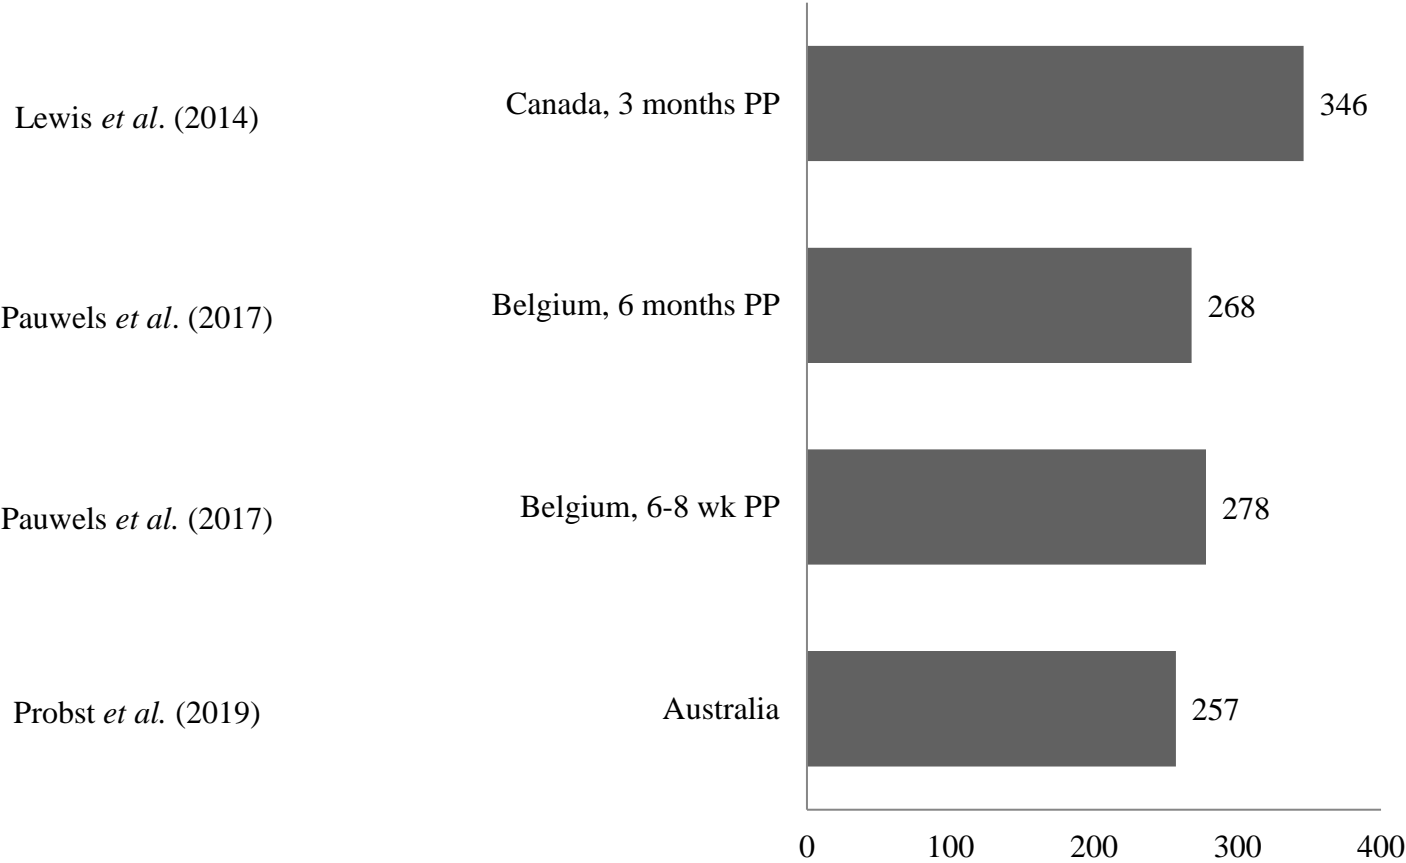

Supplement: s1 [file s1]
